# Supplementary material
Source: MDPI journal article supplement (https://www.mdpi.com/2073-4395/14/5/1063)
Supplement: s1 [file s1]

Archive with 2 entries (2 files):
- Supplementary File S1-Table S1.xlsx
- Supplementary File S2, Figure S1.pdf
