# Supplementary material
Source: MDPI journal article supplement (https://www.mdpi.com/2073-4395/14/5/1063)
Supplement: s1 [file s1 › Supplementary File S1-Table S1.xlsx]

## Sheet: Sheet1
Supplementary File S1 Table S1. Detail statistics of sequencing data
Sample name	Raw reads	Clean reads	Total mapped	Multiple mapped	Uniquely mapped	Error rate (%)	Q20 (%)	Q30 (%)	GC content (%)
CK-1	44603190	44542856	43153876 (96.88%)	2091270 (4.69%)	36236143 (81.35%)	0.03	6520705295 (98.03%)	6271723516 (94.29%)	45.07
CK-2	46483298	46424430	45100752 (97.14%)	2047477 (4.41%)	38042787 (81.94%)	0.03	6780725439 (97.80%)	6497529039 (93.72%)	45.35
CK-3	51436440	51377050	50465620 (98.22%)	2443735 (4.75%)	42502747 (82.72%)	0.02	7514857525 (98.00%)	7221998724 (94.18%)	45.18
ZG50-1	57836396	57735192	56014432 (97.01%)	2569101 (4.44%)	47361361 (82.03%)	0.05	8416968146 (97.65%)	8051875319 (93.42%)	45.38
ZG50-2	60909534	60797328	59374908 (97.66%)	2762061 (4.54%)	49977200 (82.20%)	0.07	8857927364 (97.60%)	8465341361 (93.27%)	45.32
ZG50-3	45809576	45749544	44803578 (97.93%)	2115210 (4.62%)	37652147 (82.30%)	0.03	6695946148 (97.95%)	6434825860 (94.13%)	45.15
ZG90-1	46747160	46683178	45671888 (97.83%)	2055837 (4.40%)	38509570 (82.49%)	0.02	6838251964 (98.05%)	6557590379 (94.02%)	45.52
ZG90-2	43766588	43698080	42580920 (97.44%)	1927829 (4.41%)	35994098 (82.36%)	0.04	6373072366 (97.80%)	6108893498 (93.74%)	45.48
ZG90-3	36052664	35998246	35285494 (98.02%)	1598968 (4.44%)	29691904 (82.48%)	0.04	5264912780 (97.91%)	5053268794 (93.98%)	45.21
