# Supplementary material
Source: MDPI journal article supplement (https://www.mdpi.com/2073-4395/14/5/1063)

## Supplementary File S2, Figure S1 Go annotation in different comparison groups

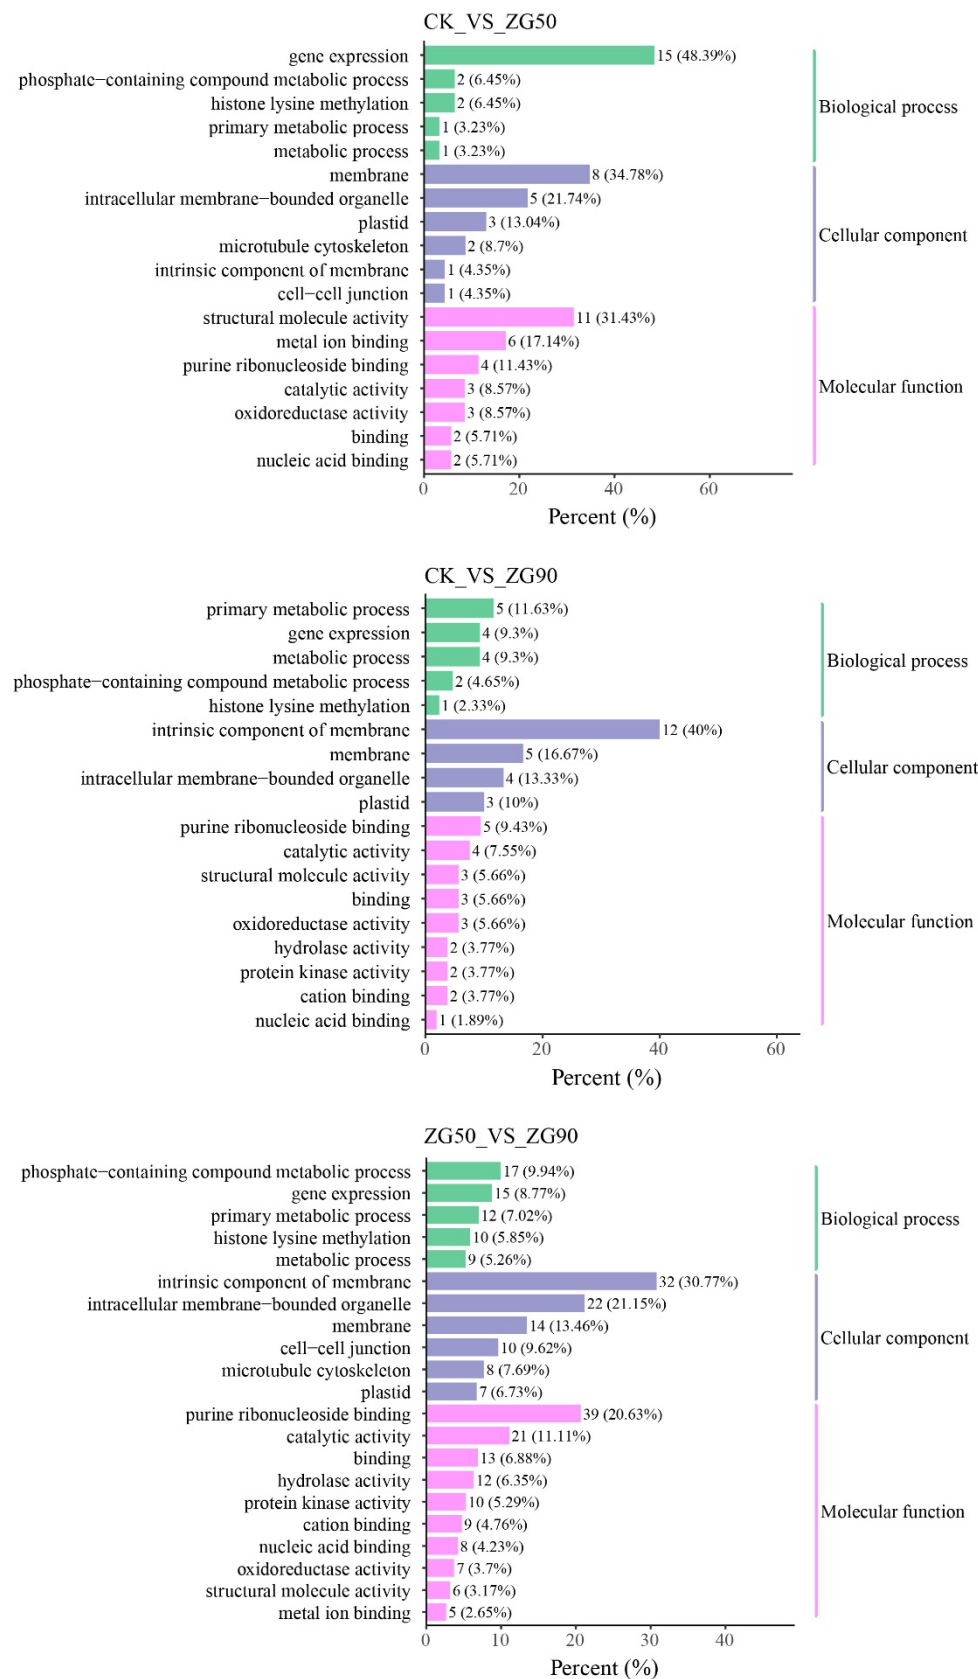

Supplement: s1 [file s1]
